# Supplementary material for: Response outcome gates the effect of spontaneous cortical state fluctuations on perceptual decisions
Source: eLife journal article supplement (doi:10.7554/elife.81774), 2023-05-17
Supplement: supp [file elife-81774-supp-v1.zip]

| Figure              | Target   | Predictor                              | Median    | 95% CI <sub>Low</sub> | 95% CI <sub>High</sub> | p-value | N <sub>obs</sub> |
|---------------------|----------|----------------------------------------|-----------|-----------------------|------------------------|---------|------------------|
| 2A                  | FR       | Intercept                              | 1.66      | 1.65                  | 1.68                   | <0.0002 | 5687             |
|                     |          | OpticF                                 | 0.06      | 0.04                  | 0.08                   | <0.0002 |                  |
|                     |          | PupilS                                 | 0.04      | 0.02                  | 0.05                   | 0.67    |                  |
| 2A                  | Synch    | Intercept                              | 1.095     | 1.092                 | 1.099                  | <0.0002 | 5687             |
|                     |          | OpticF                                 | -0.0007   | -0.0041               | 0.0027                 | 0.72    |                  |
|                     |          | PupilS                                 | 0.0029    | -0.0004               | 0.0060                 | 0.09    |                  |
| 2D                  | FR       | Intercept                              | 0.004     | -0.006                | 0.015                  | 0.40    | 5687             |
|                     |          | OpticF <sub>i</sub>                    | 0.091     | 0.078                 | 0.106                  | <0.0002 |                  |
|                     |          | PupilS <sub>i</sub>                    | 0.004     | -0.007                | 0.015                  | 0.52    |                  |
| 2D                  | Synch    | Intercept                              | 0.0004    | -0.0023               | 0.0030                 | 0.77    | 5687             |
|                     |          | OpticF <sub>i</sub>                    | 0.004     | 0.001                 | 0.007                  | 0.012   |                  |
|                     |          | PupilS <sub>i</sub>                    | -0.008    | -0.011                | -0.005                 | <0.0002 |                  |
| 3A                  | Accuracy | Intercept                              | 1.20      | 1.09                  | 1.31                   | <0.0002 | 3230             |
|                     |          | Stim                                   | 0.60      | 0.46                  | 0.76                   | <0.0002 |                  |
|                     |          | pCorr                                  | -0.13     | -0.23                 | -0.04                  | 0.006   |                  |
|                     |          | TrN                                    | 0.14      | 0.04                  | 0.24                   | 0.005   |                  |
|                     |          | OpticF <sub>i</sub>                    | 0.01      | -0.09                 | 0.12                   | 0.83    |                  |
|                     |          | PupilS <sub>i</sub>                    | 0.009     | -0.090                | 0.111                  | 0.85    |                  |
|                     |          | FR <sub>i</sub>                        | 0.07      | -0.02                 | 0.16                   | 0.16    |                  |
|                     |          | Synch <sub>i</sub>                     | -0.005    | -0.010                | 0.091                  | 0.91    |                  |
| 3C                  | Accuracy | Intercept                              | 1.49      | 1.25                  | 1.77                   | <0.0002 | 757              |
|                     |          | Stim                                   | 0.75      | 0.44                  | 1.15                   | <0.0002 |                  |
|                     |          | TrN                                    | 0.33      | 0.11                  | 0.57                   | 0.005   |                  |
|                     |          | OpticF <sub>i</sub>                    | 0.01      | -0.21                 | 0.25                   | 0.92    |                  |
|                     |          | PupilS <sub>i</sub>                    | 0.01      | -0.20                 | 0.24                   | 0.90    |                  |
|                     |          | FR <sub>i</sub>                        | 0.28      | 0.07                  | 0.49                   | 0.006   |                  |
|                     |          | Synch <sub>i</sub>                     | -0.28     | -0.50                 | -0.060                 | 0.012   |                  |
|                     |          | FR <sub>i</sub> & Desynch <sub>i</sub> | 0.36      | 0.15                  | 0.58                   | 0.0006  |                  |
| 3E                  | Accuracy | Intercept                              | 1.15      | 1.03                  | 1.28                   | <0.0002 | 2473             |
|                     |          | Stim                                   | 0.60      | 0.45                  | 0.79                   | <0.0002 |                  |
|                     |          | TrN                                    | 0.12      | 0.01                  | 0.23                   | 0.03    |                  |
|                     |          | OpticF <sub>i</sub>                    | 0.001     | -0.119                | 0.125                  | 0.98    |                  |
|                     |          | PupilS <sub>i</sub>                    | 0.004     | -0.111                | 0.121                  | 0.95    |                  |
|                     |          | FR <sub>i</sub>                        | 0.03      | -0.08                 | 0.14                   | 0.64    |                  |
|                     |          | Synch <sub>i</sub>                     | 0.07      | -0.04                 | 0.18                   | 0.22    |                  |
|                     |          | FR <sub>i</sub> & Synch <sub>i</sub>   | 0.07      | -0.04                 | 0.18                   | 0.20    |                  |
| 3H                  | Accuracy | Intercept                              | 1.58      | 1.34                  | 1.87                   | <0.0002 | 833              |
|                     |          | Stim                                   | 0.64      | 0.35                  | 1.05                   | <0.0002 |                  |
|                     |          | TrN                                    | 0.29      | 0.09                  | 0.53                   | 0.007   |                  |
|                     |          | OpticF <sub>i</sub>                    | -0.06     | -0.30                 | 0.19                   | 0.59    |                  |
|                     |          | PupilS <sub>i</sub>                    | -0.18     | -0.41                 | 0.04                   | 0.11    |                  |
|                     |          | FR <sub>i</sub>                        | 0.04      | -0.18                 | 0.27                   | 0.70    |                  |
|                     |          | Synch <sub>i</sub>                     | -0.01     | -0.24                 | 0.21                   | 0.92    |                  |
|                     |          | 3I                                     | Accuracy  | Intercept             | 1.33                   | 1.20    |                  |
| Stim                | 0.54     |                                        |           | 0.40                  | 0.72                   | <0.0002 |                  |
| TrN                 | 0.20     |                                        |           | 0.09                  | 0.32                   | 0.001   |                  |
| OpticF <sub>i</sub> | -0.04    |                                        |           | -0.16                 | 0.09                   | 0.57    |                  |
| PupilS <sub>i</sub> | 0.06     |                                        |           | -0.06                 | 0.18                   | 0.30    |                  |
| FR <sub>i</sub>     | -0.004   |                                        |           | -0.113                | 0.105                  | 0.95    |                  |
| Synch <sub>i</sub>  | 0.08     |                                        |           | -0.03                 | 0.20                   | 0.14    |                  |
| 4E                  | pCorr    |                                        |           | Intercept             | 1.63                   | 1.48    | 1.80             |
|                     |          | TrN                                    | 0.25      | 0.14                  | 0.36                   | 0.001   |                  |
|                     |          | OpticF <sub>i</sub>                    | 0.08      | -0.05                 | 0.21                   | 0.24    |                  |
|                     |          | PupilS <sub>i</sub>                    | 1.18      | 1.02                  | 1.35                   | <0.0002 |                  |
|                     |          | FR <sub>i</sub>                        | -0.22     | -0.34                 | -0.10                  | <0.0002 |                  |
|                     |          | Synch <sub>i</sub>                     | -0.0002   | -0.1052               | 0.1056                 | 0.995   |                  |
|                     |          | 5D                                     | Premature | Intercept             | -2.82                  | -3.01   | -2.64            |
| TrN                 | -0.36    |                                        |           | -0.51                 | -0.22                  | <0.0002 |                  |
| pPrem               | -0.04    |                                        |           | -0.24                 | 0.09                   | 0.56    |                  |
| pCorr               | 0.17     |                                        |           | 0.02                  | 0.35                   | 0.03    |                  |
| pSkip               | -0.08    |                                        |           | -0.29                 | 0.07                   | 0.30    |                  |
| OpticF <sub>i</sub> | 0.14     |                                        |           | 0.01                  | 0.27                   | 0.03    |                  |
| PupilS <sub>i</sub> | -0.17    |                                        |           | -0.32                 | -0.03                  | 0.02    |                  |
| FR <sub>i</sub>     | 0.03     |                                        |           | -0.10                 | 0.16                   | 0.60    |                  |
| Synch <sub>i</sub>  | 0.11     |                                        |           | -0.02                 | 0.23                   | 0.09    |                  |
| 5F                  | Skip     | Intercept                              | -1.74     | -1.94                 | -1.59                  | <0.0002 | 5488             |
|                     |          | TrN                                    | 0.65      | 0.52                  | 0.81                   | <0.0002 |                  |
|                     |          | pPrem                                  | -0.09     | -0.22                 | 0.01                   | 0.08    |                  |
|                     |          | pCorr                                  | -0.38     | -0.50                 | -0.25                  | <0.0002 |                  |
|                     |          | pSkip                                  | 0.54      | 0.44                  | 0.64                   | <0.0002 |                  |
|                     |          | OpticF <sub>i</sub>                    | 0.21      | 0.10                  | 0.33                   | 0.0006  |                  |
|                     |          | PupilS <sub>i</sub>                    | 0.04      | -0.06                 | 0.14                   | 0.40    |                  |
|                     |          | FR <sub>i</sub>                        | 0.07      | -0.03                 | 0.16                   | 0.19    |                  |
|                     |          | Synch <sub>i</sub>                     | 0.005     | -0.084                | 0.098                  | 0.90    |                  |
