# Supplementary figures and images for: Response outcome gates the effect of spontaneous cortical state fluctuations on perceptual decisions
Source: eLife journal article supplement (doi:10.7554/elife.81774), 2023-05-17

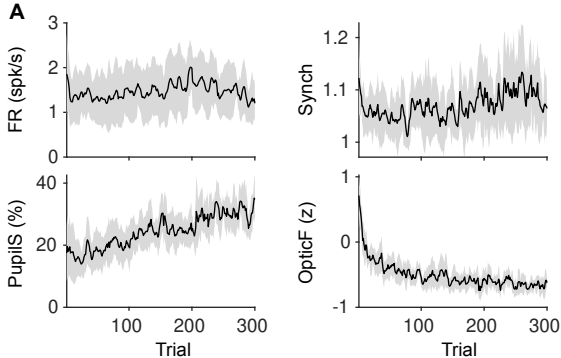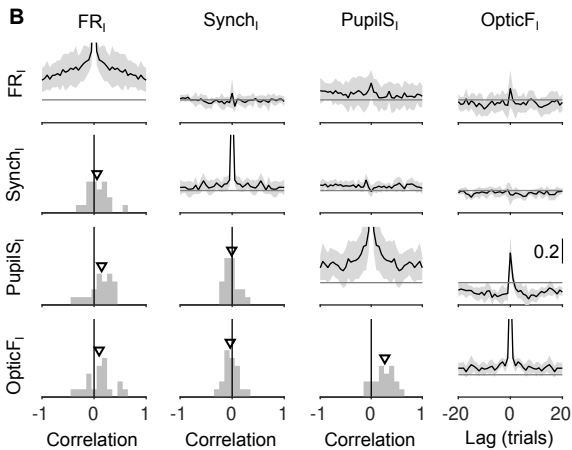

Supplement: supp [file elife-81774-supp-v1.zip]

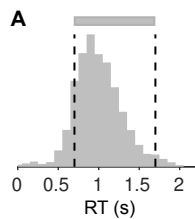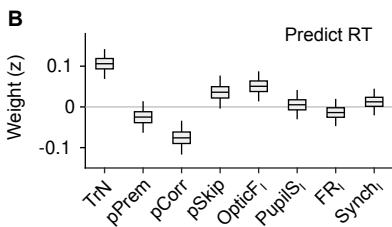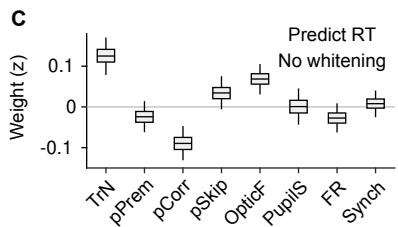

Supplement: supp [file elife-81774-supp-v1.zip]

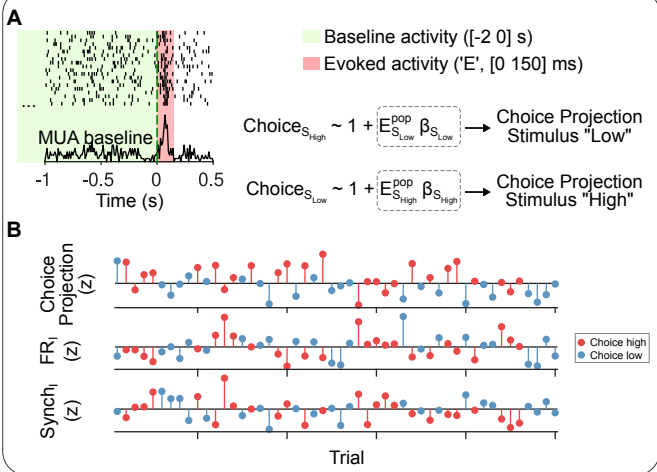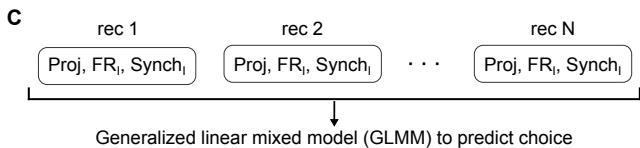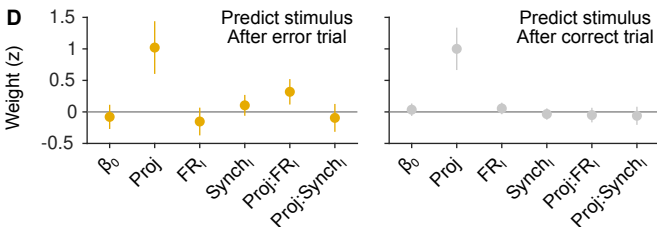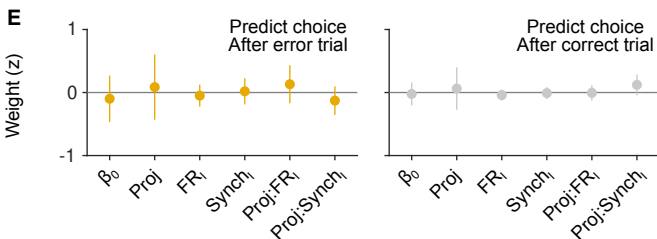

Supplement: supp [file elife-81774-supp-v1.zip]

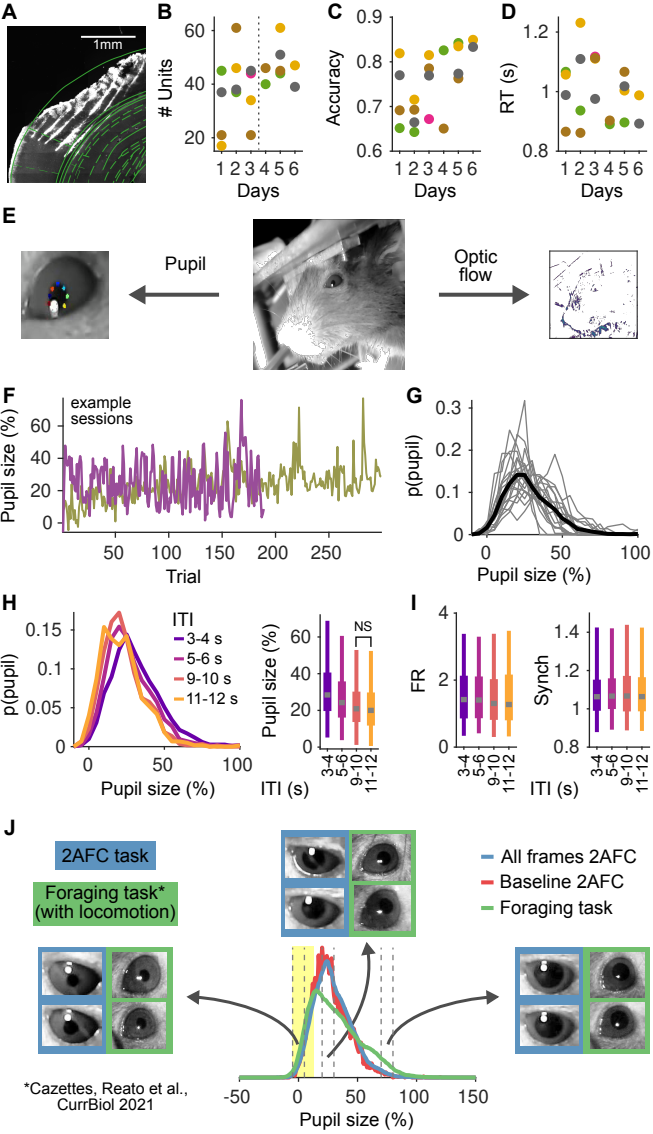

Supplement: supp [file elife-81774-supp-v1.zip]

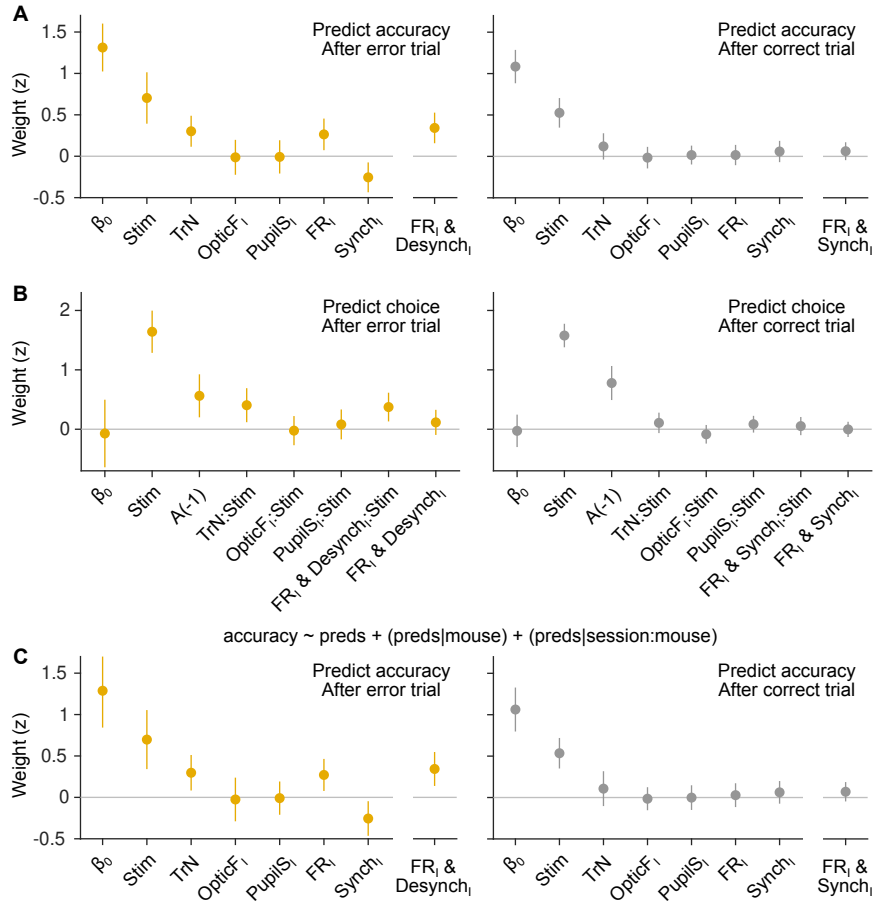

Supplement: supp [file elife-81774-supp-v1.zip]

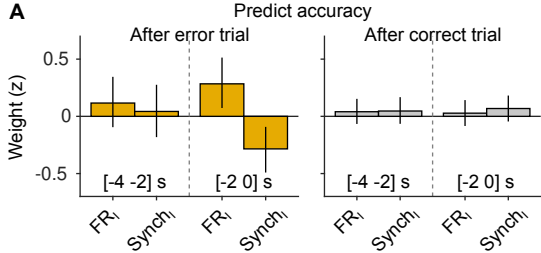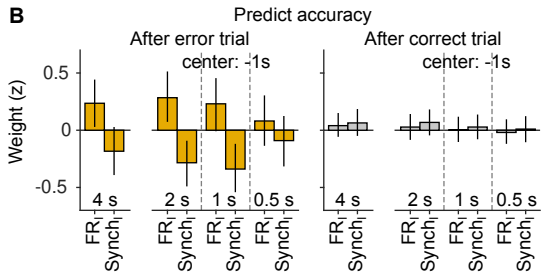

Supplement: supp [file elife-81774-supp-v1.zip]

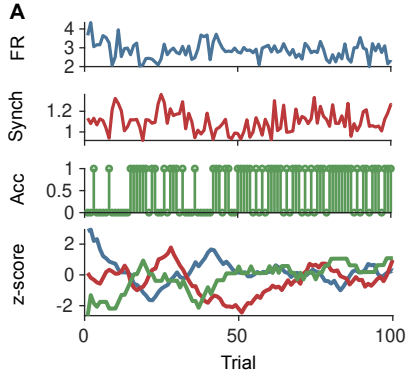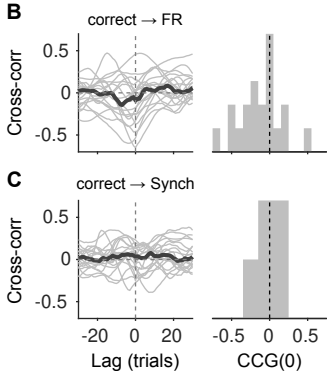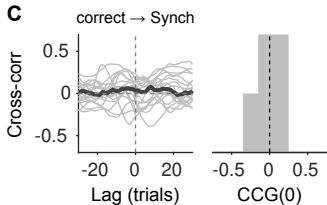

Supplement: supp [file elife-81774-supp-v1.zip]

# NO WHITENING

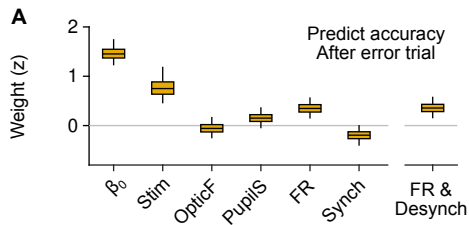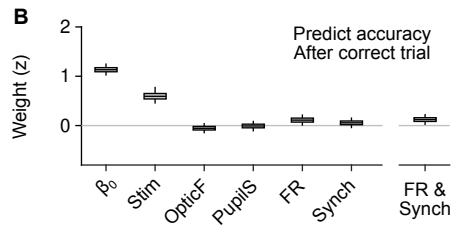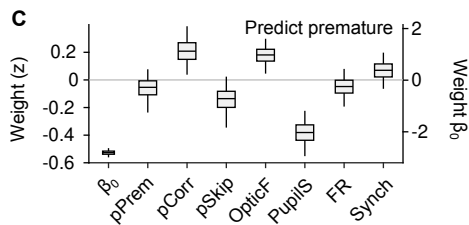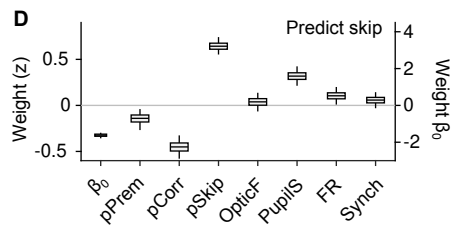

# NO WHITENING - TrN

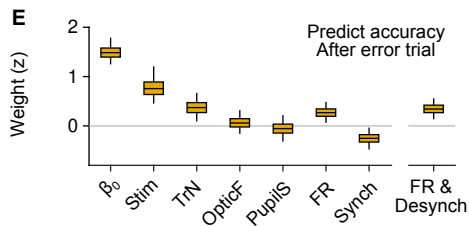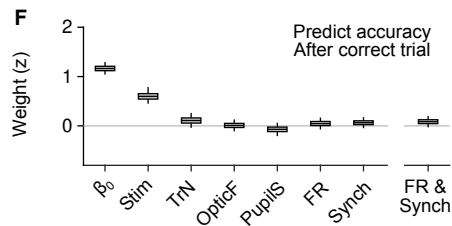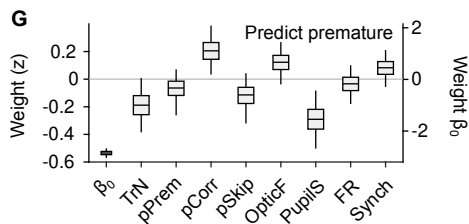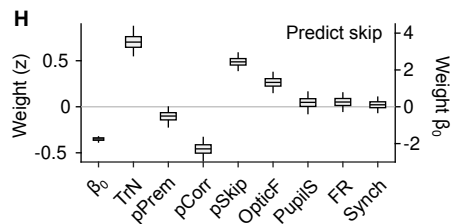

Supplement: supp [file elife-81774-supp-v1.zip]

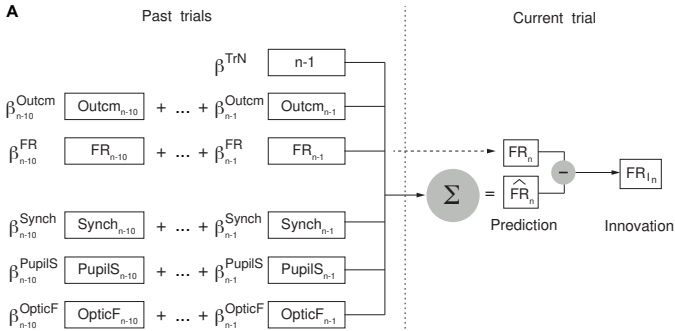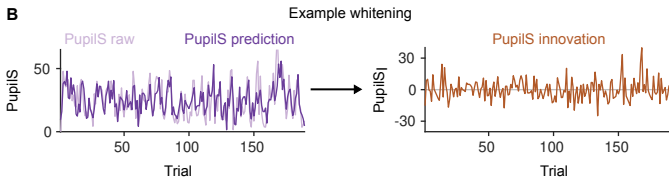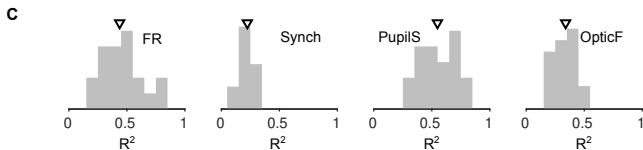

Supplement: supp [file elife-81774-supp-v1.zip]

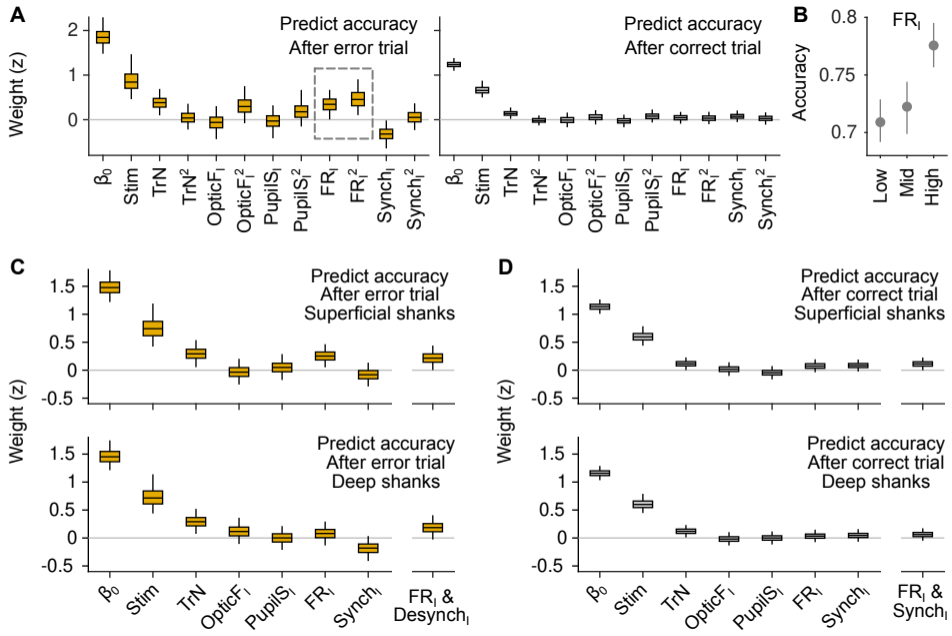

Supplement: supp [file elife-81774-supp-v1.zip]
